# Supplementary material for: Three Mn(ii) coordination polymers with a bispyridyl-based quinolinate ligand: the anion-controlled tunable structural and magnetic properties
Source: Royal Society of Chemistry journal article supplement (doi:10.1039/c4dt00877d), 2014-01-01

# Three Mn(II) Coordination Polymers with a Bispyridyl-based Quinolate Ligand: the Anion-Controlled Tunable Structural and Magnetic Properties

*Guozan Yuan\**, *Weilong Shan*, *Bin Liu*, *Lulu Rong*, *Xianwen Wei\**

School of Chemistry and Chemical Engineering, Anhui University of Technology,  
Maanshan, 243002, China.

\* E-mail: guozan@ahut.edu.cn (Guozan Yuan); xwwwei@ahut.edu.cn (Xianwen Wei)

## Table of Content

1. **Table S1.** Selected Bond lengths [ $\text{\AA}$ ] and angles [ $^\circ$ ] for L-MOM.
2. **Table S2.** Selected Bond lengths [ $\text{\AA}$ ] and angles [ $^\circ$ ] for **1**.
3. **Table S3.** Selected Bond lengths [ $\text{\AA}$ ] and angles [ $^\circ$ ] for **2**.
4. **Table S4.** Selected Bond lengths [ $\text{\AA}$ ] and angles [ $^\circ$ ] for **3**.
5. **Fig. S1.** View of supramolecular structures of L-MOM.
6. **Fig. S2-4.** View of supramolecular structures of **1**.
7. **Fig. S5-6.** View of supramolecular structures of **2**.
8. **Fig. S7-9.** View of supramolecular structures of **3**.
9. **Fig. S10.** Emission spectrum of the ligand L-MOM.

1. Table S1. Selected Bond lengths [ $\text{\AA}$ ] and angles [ $^\circ$ ] for L-MOM.

---

|             |          |
|-------------|----------|
| O(1)-C(2)   | 1.380(6) |
| O(1)-C(1)   | 1.413(7) |
| N(1)-C(11)  | 1.313(5) |
| N(1)-C(8)   | 1.367(4) |
| O(2)-C(3)   | 1.368(4) |
| O(2)-C(2)   | 1.436(5) |
| N(2)-C(16)  | 1.330(5) |
| N(2)-C(15)  | 1.338(5) |
| O(3)-C(24)  | 1.391(5) |
| O(3)-C(23)  | 1.430(5) |
| N(3)-C(20)  | 1.327(5) |
| N(3)-C(21)  | 1.343(5) |
| C(3)-C(4)   | 1.370(4) |
| C(3)-C(8)   | 1.448(5) |
| O(4)-C(25)  | 1.387(4) |
| O(4)-C(24)  | 1.420(4) |
| N(4)-C(33)  | 1.329(4) |
| N(4)-C(26)  | 1.363(4) |
| C(4)-C(5)   | 1.426(4) |
| C(4)-C(13)  | 1.498(4) |
| N(5)-C(37)  | 1.326(6) |
| N(5)-C(38)  | 1.328(6) |
| C(5)-C(6)   | 1.363(4) |
| N(6)-C(42)  | 1.336(5) |
| N(6)-C(43)  | 1.335(5) |
| C(6)-C(7)   | 1.423(5) |
| C(6)-C(18)  | 1.497(4) |
| C(7)-C(9)   | 1.410(5) |
| C(7)-C(8)   | 1.430(5) |
| C(9)-C(10)  | 1.357(5) |
| C(10)-C(11) | 1.413(5) |
| C(11)-C(12) | 1.519(5) |
| C(13)-C(17) | 1.379(5) |
| C(13)-C(14) | 1.399(4) |
| C(14)-C(15) | 1.373(5) |
| C(16)-C(17) | 1.386(5) |
| C(18)-C(19) | 1.386(5) |
| C(18)-C(22) | 1.402(4) |
| C(19)-C(20) | 1.381(5) |
| C(21)-C(22) | 1.386(5) |
| C(25)-C(30) | 1.364(4) |
| C(25)-C(26) | 1.442(4) |
| C(26)-C(27) | 1.427(4) |

|             |          |
|-------------|----------|
| C(27)-C(31) | 1.415(4) |
| C(27)-C(28) | 1.432(5) |
| C(28)-C(29) | 1.372(4) |
| C(28)-C(40) | 1.486(5) |
| C(29)-C(30) | 1.417(4) |
| C(30)-C(35) | 1.494(4) |
| C(31)-C(32) | 1.368(5) |
| C(32)-C(33) | 1.415(5) |
| C(33)-C(34) | 1.496(5) |
| C(35)-C(39) | 1.397(5) |
| C(35)-C(36) | 1.414(5) |
| C(36)-C(37) | 1.377(5) |
| C(38)-C(39) | 1.387(5) |
| C(40)-C(44) | 1.374(5) |
| C(40)-C(41) | 1.400(5) |
| C(41)-C(42) | 1.373(5) |
| C(43)-C(44) | 1.384(5) |

|                  |          |
|------------------|----------|
| C(2)-O(1)-C(1)   | 114.8(4) |
| C(11)-N(1)-C(8)  | 118.4(3) |
| C(3)-O(2)-C(2)   | 118.7(3) |
| C(16)-N(2)-C(15) | 115.3(3) |
| O(1)-C(2)-O(2)   | 112.1(4) |
| C(24)-O(3)-C(23) | 113.6(3) |
| C(20)-N(3)-C(21) | 115.0(3) |
| O(2)-C(3)-C(4)   | 120.1(3) |
| O(2)-C(3)-C(8)   | 119.3(3) |
| C(4)-C(3)-C(8)   | 120.5(3) |
| C(25)-O(4)-C(24) | 113.7(3) |
| C(33)-N(4)-C(26) | 118.4(3) |
| C(3)-C(4)-C(5)   | 118.7(3) |
| C(3)-C(4)-C(13)  | 123.3(3) |
| C(5)-C(4)-C(13)  | 117.9(3) |
| C(37)-N(5)-C(38) | 116.8(3) |
| C(6)-C(5)-C(4)   | 123.3(3) |
| C(42)-N(6)-C(43) | 115.5(3) |
| C(5)-C(6)-C(7)   | 118.8(3) |
| C(5)-C(6)-C(18)  | 117.3(3) |
| C(7)-C(6)-C(18)  | 123.9(3) |
| C(9)-C(7)-C(6)   | 124.1(3) |
| C(9)-C(7)-C(8)   | 116.1(3) |
| C(6)-C(7)-C(8)   | 119.7(3) |
| N(1)-C(8)-C(7)   | 123.1(3) |
| N(1)-C(8)-C(3)   | 118.0(3) |

|                   |          |
|-------------------|----------|
| C(7)-C(8)-C(3)    | 118.8(3) |
| C(10)-C(9)-C(7)   | 119.8(3) |
| C(9)-C(10)-C(11)  | 120.3(3) |
| N(1)-C(11)-C(10)  | 122.3(3) |
| N(1)-C(11)-C(12)  | 116.6(4) |
| C(10)-C(11)-C(12) | 121.1(3) |
| C(17)-C(13)-C(14) | 116.5(3) |
| C(17)-C(13)-C(4)  | 119.8(3) |
| C(14)-C(13)-C(4)  | 123.6(3) |
| C(15)-C(14)-C(13) | 119.4(3) |
| N(2)-C(15)-C(14)  | 124.6(4) |
| N(2)-C(16)-C(17)  | 124.5(4) |
| C(13)-C(17)-C(16) | 119.6(3) |
| C(19)-C(18)-C(22) | 116.9(3) |
| C(19)-C(18)-C(6)  | 120.0(3) |
| C(22)-C(18)-C(6)  | 123.0(3) |
| C(20)-C(19)-C(18) | 119.1(3) |
| N(3)-C(20)-C(19)  | 125.5(4) |
| N(3)-C(21)-C(22)  | 124.6(3) |
| C(21)-C(22)-C(18) | 118.8(3) |
| O(3)-C(24)-O(4)   | 112.1(3) |
| C(30)-C(25)-O(4)  | 121.4(3) |
| C(30)-C(25)-C(26) | 121.3(3) |
| O(4)-C(25)-C(26)  | 117.3(3) |
| N(4)-C(26)-C(27)  | 123.3(3) |
| N(4)-C(26)-C(25)  | 118.5(3) |
| C(27)-C(26)-C(25) | 118.2(3) |
| C(31)-C(27)-C(26) | 116.2(3) |
| C(31)-C(27)-C(28) | 123.3(3) |
| C(26)-C(27)-C(28) | 120.4(3) |
| C(29)-C(28)-C(27) | 117.6(3) |
| C(29)-C(28)-C(40) | 119.2(3) |
| C(27)-C(28)-C(40) | 123.1(3) |
| C(28)-C(29)-C(30) | 123.7(3) |
| C(25)-C(30)-C(29) | 118.6(3) |
| C(25)-C(30)-C(35) | 122.3(3) |
| C(29)-C(30)-C(35) | 119.0(3) |
| C(32)-C(31)-C(27) | 119.9(3) |
| C(31)-C(32)-C(33) | 119.9(3) |
| N(4)-C(33)-C(32)  | 122.2(3) |
| N(4)-C(33)-C(34)  | 117.5(3) |
| C(32)-C(33)-C(34) | 120.3(3) |
| C(39)-C(35)-C(36) | 116.9(3) |

|                   |          |
|-------------------|----------|
| C(39)-C(35)-C(30) | 120.0(3) |
| C(36)-C(35)-C(30) | 123.1(3) |
| C(37)-C(36)-C(35) | 118.6(4) |
| N(5)-C(37)-C(36)  | 124.6(4) |
| N(5)-C(38)-C(39)  | 124.1(4) |
| C(38)-C(39)-C(35) | 119.0(4) |
| C(44)-C(40)-C(41) | 116.1(3) |
| C(44)-C(40)-C(28) | 121.7(3) |
| C(41)-C(40)-C(28) | 122.1(3) |
| C(42)-C(41)-C(40) | 119.3(4) |
| N(6)-C(42)-C(41)  | 124.8(4) |
| N(6)-C(43)-C(44)  | 123.6(4) |
| C(40)-C(44)-C(43) | 120.6(3) |

---

2. Table S2. Selected Bond lengths [ $\text{\AA}$ ] and angles [ $^\circ$ ] for **1**.

---

|                     |          |
|---------------------|----------|
| Mn(1)-O(3)          | 2.041(5) |
| Mn(1)-O(3)#1        | 2.041(5) |
| Mn(1)-N(1)#1        | 2.234(7) |
| Mn(1)-N(1)          | 2.234(7) |
| Mn(1)-N(5)#1        | 2.261(6) |
| Mn(1)-N(5)          | 2.261(6) |
| O(1)-Mn(2)          | 1.977(5) |
| Mn(2)-O(2)          | 1.934(5) |
| Mn(2)-N(2)#2        | 2.088(8) |
| Mn(2)-N(4)          | 2.181(7) |
| Mn(2)-N(7)          | 2.271(8) |
| N(2)-Mn(2)#3        | 2.088(8) |
| O(3)-Mn(1)-O(3)#1   | 180.0    |
| O(3)-Mn(1)-N(1)#1   | 102.3(2) |
| O(3)#1-Mn(1)-N(1)#1 | 77.7(2)  |
| O(3)-Mn(1)-N(1)     | 77.7(2)  |
| O(3)#1-Mn(1)-N(1)   | 102.3(2) |
| N(1)#1-Mn(1)-N(1)   | 180.0    |
| O(3)-Mn(1)-N(5)#1   | 91.5(2)  |
| O(3)#1-Mn(1)-N(5)#1 | 88.5(2)  |
| N(1)#1-Mn(1)-N(5)#1 | 86.3(2)  |
| N(1)-Mn(1)-N(5)#1   | 93.7(2)  |
| O(3)-Mn(1)-N(5)     | 88.5(2)  |
| O(3)#1-Mn(1)-N(5)   | 91.5(2)  |
| N(1)#1-Mn(1)-N(5)   | 93.7(2)  |
| N(1)-Mn(1)-N(5)     | 86.3(2)  |

|                    |           |
|--------------------|-----------|
| N(5)#1-Mn(1)-N(5)  | 180.00(5) |
| C(27)-O(1)-Mn(2)   | 116.0(4)  |
| C(2)-N(1)-C(6)     | 117.5(8)  |
| C(2)-N(1)-Mn(1)    | 131.7(6)  |
| C(6)-N(1)-Mn(1)    | 110.1(5)  |
| O(2)-Mn(2)-O(1)    | 136.6(3)  |
| O(2)-Mn(2)-N(2)#2  | 116.2(3)  |
| O(1)-Mn(2)-N(2)#2  | 107.1(3)  |
| O(2)-Mn(2)-N(4)    | 97.4(2)   |
| O(1)-Mn(2)-N(4)    | 80.1(2)   |
| N(2)#2-Mn(2)-N(4)  | 93.9(3)   |
| O(2)-Mn(2)-N(7)    | 79.5(3)   |
| O(1)-Mn(2)-N(7)    | 98.5(2)   |
| N(2)#2-Mn(2)-N(7)  | 92.1(3)   |
| N(4)-Mn(2)-N(7)    | 174.0(3)  |
| C(47)-O(2)-Mn(2)   | 118.9(5)  |
| C(14)-N(2)-Mn(2)#3 | 129.1(6)  |
| C(13)-N(2)-Mn(2)#3 | 116.4(6)  |
| C(7)-O(3)-Mn(1)    | 115.2(5)  |
| C(22)-N(4)-Mn(2)   | 131.6(6)  |
| C(26)-N(4)-Mn(2)   | 108.5(4)  |
| C(39)-N(5)-Mn(1)   | 124.6(5)  |
| C(38)-N(5)-Mn(1)   | 121.7(5)  |

---

Symmetry transformations used to generate equivalent atoms:

#1 -x+1,-y,-z+1    #2 x+1,y,z    #3 x-1,y,z  
#4 -x+1,-y-1,-z

### 3. Table S3. Selected Bond lengths [Å] and angles [°] for **2**.

---

|                     |            |
|---------------------|------------|
| Mn(1)-O(1)          | 2.073(3)   |
| Mn(1)-O(1)#1        | 2.073(3)   |
| Mn(1)-N(2)#2        | 2.254(4)   |
| Mn(1)-N(2)#3        | 2.254(4)   |
| Mn(1)-N(1)#1        | 2.295(4)   |
| Mn(1)-N(1)          | 2.295(4)   |
| N(2)-Mn(1)#4        | 2.254(4)   |
| O(1)-Mn(1)-O(1)#1   | 180.000(1) |
| O(1)-Mn(1)-N(2)#2   | 89.56(14)  |
| O(1)#1-Mn(1)-N(2)#2 | 90.44(14)  |
| O(1)-Mn(1)-N(2)#3   | 90.44(14)  |
| O(1)#1-Mn(1)-N(2)#3 | 89.56(14)  |
| N(2)#2-Mn(1)-N(2)#3 | 180.00(17) |

|                     |            |
|---------------------|------------|
| O(1)-Mn(1)-N(1)#1   | 103.74(14) |
| O(1)#1-Mn(1)-N(1)#1 | 76.26(14)  |
| N(2)#2-Mn(1)-N(1)#1 | 93.27(16)  |
| N(2)#3-Mn(1)-N(1)#1 | 86.73(16)  |
| O(1)-Mn(1)-N(1)     | 76.26(14)  |
| O(1)#1-Mn(1)-N(1)   | 103.74(14) |
| N(2)#2-Mn(1)-N(1)   | 86.73(16)  |
| N(2)#3-Mn(1)-N(1)   | 93.27(16)  |
| N(1)#1-Mn(1)-N(1)   | 180.0      |
| C(7)-O(1)-Mn(1)     | 117.5(3)   |
| C(2)-N(1)-C(6)      | 119.5(4)   |
| C(2)-N(1)-Mn(1)     | 130.8(3)   |
| C(6)-N(1)-Mn(1)     | 109.1(3)   |
| C(13)-N(2)-Mn(1)#4  | 127.2(4)   |
| C(14)-N(2)-Mn(1)#4  | 117.9(3)   |

---

Symmetry transformations used to generate equivalent atoms:

#1  $-x+1, -y+2, -z$       #2  $-x+1, y-1/2, -z-1/2$   
#3  $x, -y+5/2, z+1/2$       #4  $-x+1, y+1/2, -z-1/2$

4. Table S4. Selected Bond lengths [ $\text{\AA}$ ] and angles [ $^\circ$ ] for **3**.

---

|                     |            |
|---------------------|------------|
| Mn(1)-O(1)          | 2.065(4)   |
| Mn(1)-O(2)          | 2.069(4)   |
| Mn(1)-N(3)#1        | 2.291(5)   |
| Mn(1)-N(1)          | 2.295(6)   |
| Mn(1)-N(5)#2        | 2.296(5)   |
| Mn(1)-N(4)          | 2.301(6)   |
| N(3)-Mn(1)#3        | 2.291(5)   |
| N(5)-Mn(1)#4        | 2.296(5)   |
| O(1)-Mn(1)-O(2)     | 179.72(19) |
| O(1)-Mn(1)-N(3)#1   | 90.88(18)  |
| O(2)-Mn(1)-N(3)#1   | 89.11(19)  |
| O(1)-Mn(1)-N(1)     | 76.21(17)  |
| O(2)-Mn(1)-N(1)     | 103.51(17) |
| N(3)#1-Mn(1)-N(1)   | 90.9(2)    |
| O(1)-Mn(1)-N(5)#2   | 89.68(18)  |
| O(2)-Mn(1)-N(5)#2   | 90.33(18)  |
| N(3)#1-Mn(1)-N(5)#2 | 178.9(2)   |
| N(1)-Mn(1)-N(5)#2   | 88.3(2)    |
| O(1)-Mn(1)-N(4)     | 104.33(17) |
| O(2)-Mn(1)-N(4)     | 75.94(17)  |

|                    |          |
|--------------------|----------|
| N(3)#1-Mn(1)-N(4)  | 90.2(2)  |
| N(1)-Mn(1)-N(4)    | 178.8(2) |
| N(5)#2-Mn(1)-N(4)  | 90.6(2)  |
| C(7)-O(1)-Mn(1)    | 117.6(4) |
| C(2)-N(1)-Mn(1)    | 131.1(5) |
| C(6)-N(1)-Mn(1)    | 109.5(4) |
| C(30)-O(2)-Mn(1)   | 118.3(4) |
| C(18)-N(3)-Mn(1)#3 | 121.5(4) |
| C(19)-N(3)-Mn(1)#3 | 121.1(5) |
| C(22)-N(4)-Mn(1)   | 132.2(5) |
| C(26)-N(4)-Mn(1)   | 109.4(4) |
| C(34)-N(5)-Mn(1)#4 | 123.5(4) |
| C(33)-N(5)-Mn(1)#4 | 120.7(4) |

---

Symmetry transformations used to generate equivalent atoms:

#1  $x+1/2,-y+1,z$     #2  $x-1/2,-y,z$     #3  $x-1/2,-y+1,z$

#4  $x+1/2,-y,z$



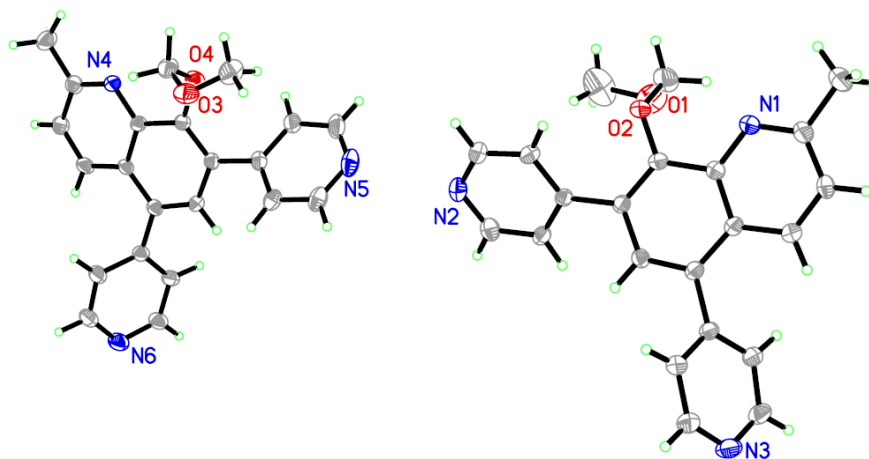

6.1. Fig. S2. View of a 1D infinite chain fabricated by cyclic tetramers  $Mn_4L_6$  in complex **1** along *a* axis.

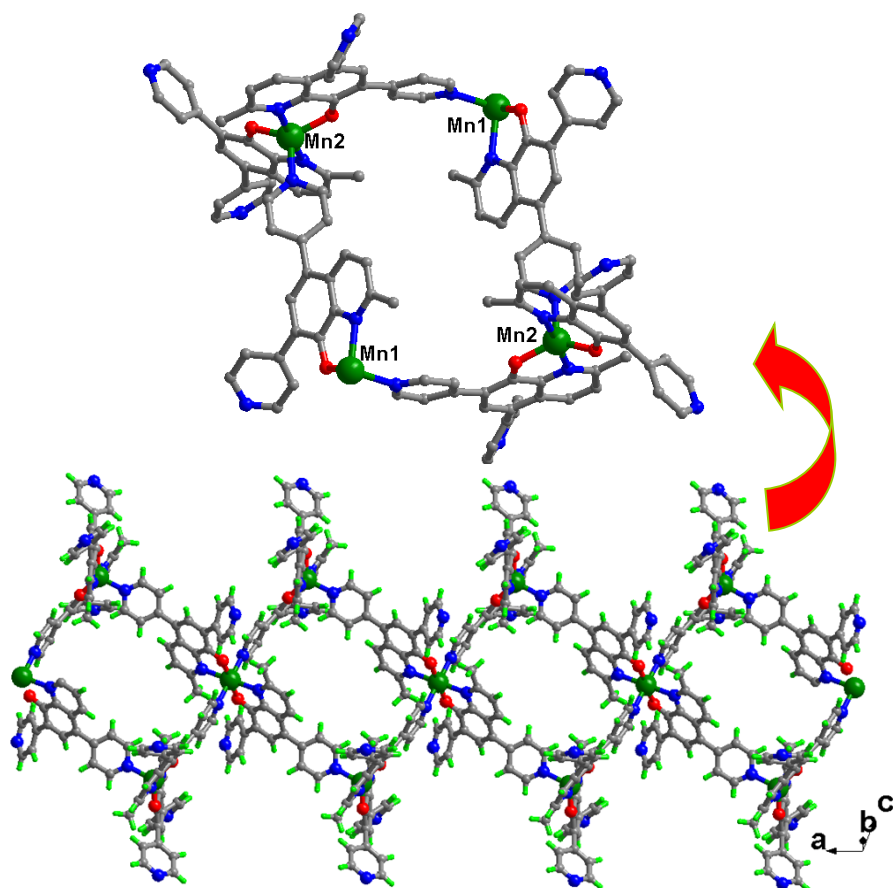

6.2. Fig. S3. Schematic representation of 3-fold interpenetrated architecture in **1**.

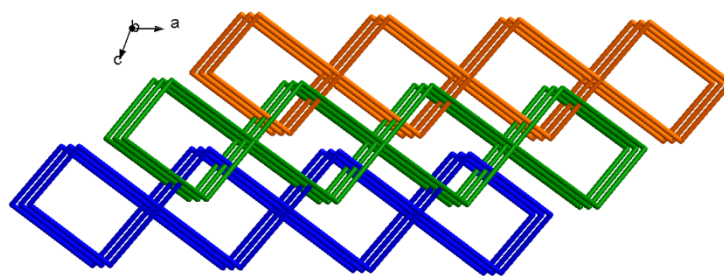

6.3. Fig. S4. View of the 3D architecture of complex 1.

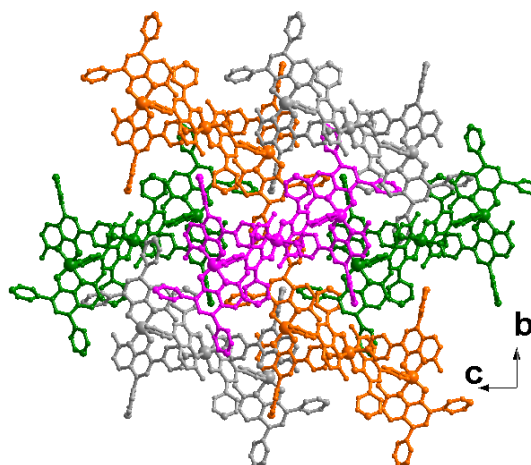

7.1. Fig. S5. 2D grids are further linked by the C–H $\cdots$  $\pi$  (between C–H group of pyridine and phenolato ring of adjacent ligand) interactions along the *a* axis to form a 3D framework structure in 2.

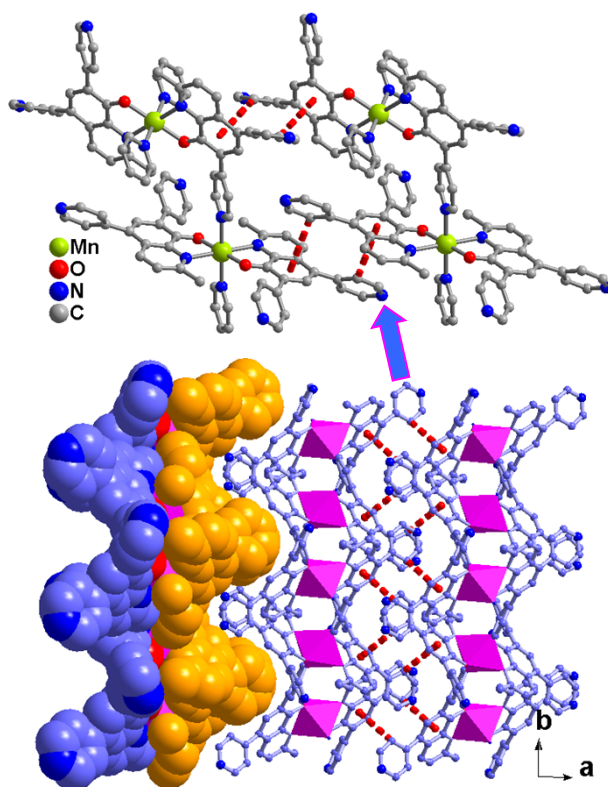

7.2. Fig. S6. View of 3D framework structure in 2.

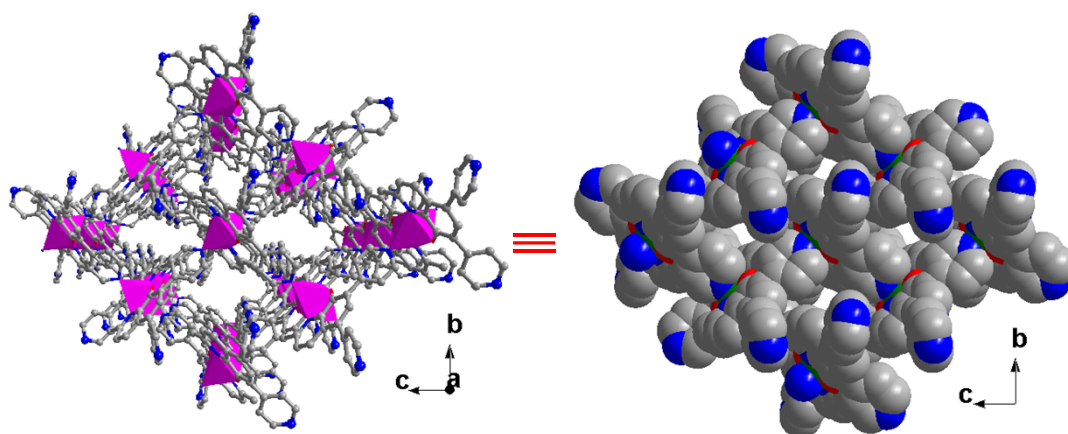

8.1. Fig. S7. Views of the coordination geometries of Mn(II) atoms in **3**.

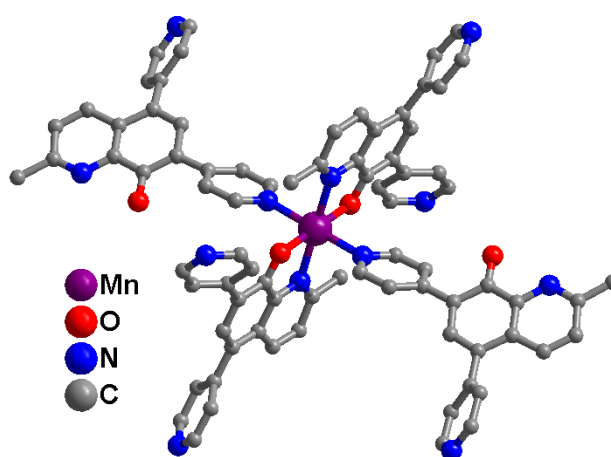

8.2. Fig. S8. 2D rhombohedral grid structure of complex **3** in the *ab* plane

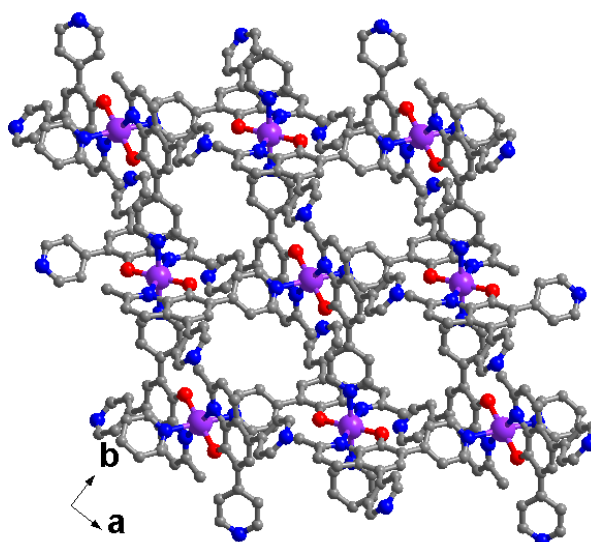

8.2. Fig. S9. Space-filling mode of 3D structure in **3**.

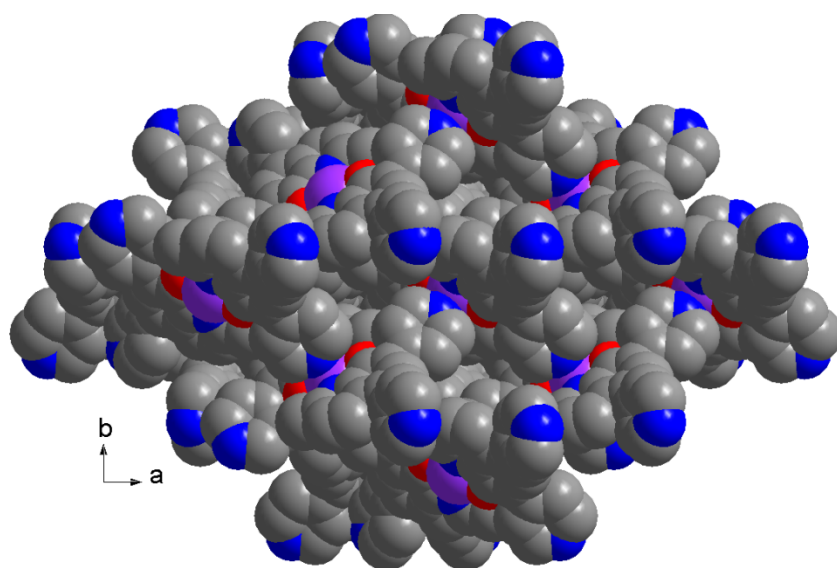

9. Fig. S10. Emission spectrum of the ligand L-MOM.

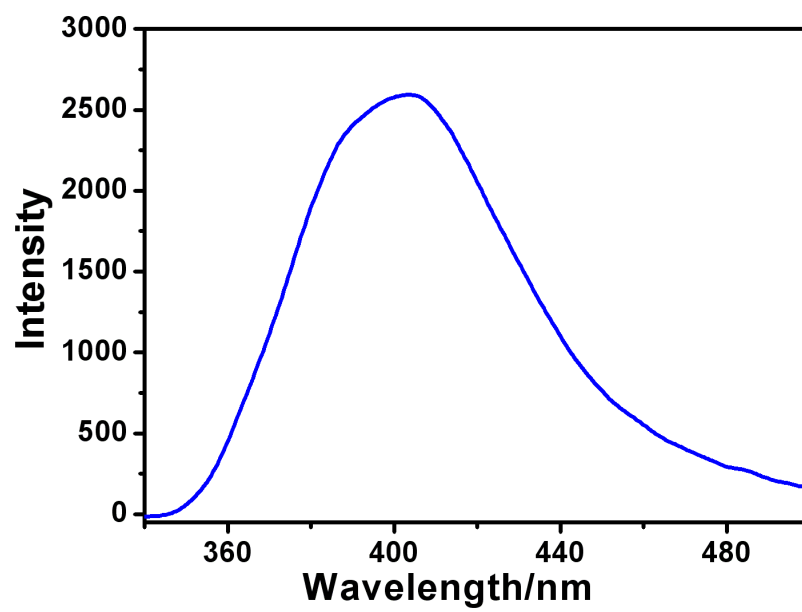

Supplement: c4dt00877d1.pdf [file c4dt00877d1.pdf]
